# Supplementary material for: Early Detection of Parkinson’s Disease Using a Single-Arm Wearable Sensor and Convolutional Neural Networks
Source: Research Square preprint supplement (doi:10.21203/rs.3.rs-7285962/v1), 2025-08-12
Supplement: Supplementary file 1 [file 6a3656dea338acb276cd6b50.xlsx]

## Sheet: Study participants
Early PDs	Sex (male/female)	Age (years)	Height (cm)	Body mass (kg)	BMI (kg/m2)	MMSE (scores)	MoCA (scores)	6MWT (m)	Disease duration (years)	Treatment duration (years)	L-Dopa equivalent dose (mg/day)	UPDRS Total (scores)	UPDRS III (scores)	Hoehn & Yahr scale (stage)
1	2	62	161	54	20.8	27	30	204.2	8.58	8.58	450	51	37	2
2	2	70	154	59	24.9	28	25	222.4	3.86	3.11	100	32	20	2
3	2	59	164	56	20.8	30	29	260	3.19	3.03	400	31	20	1
4	1	77	162	77	29.3	29	25	426	5.7	5.53	820	79	36	2
5	1	53	176	92	29.7	30	29	471.6	10.87	9.86	1220	58	31	2
6	2	69	156	69	28.4	29	28	190.6	8.87	8.87	1025	48	23	1
7	1	52	178	78	24.6	28	27	525.13	4.87	1.02	250	27	15	1
8	2	59	161	65	25.1	27	27	391.8	4.87671	2.47671	550	57	35	2
9	1	83	171	64	21.9	30	26	392	6.63	6.46	1350	65	29	2
10	1	67	169	79	27.7	30	28	400	3.79	3.79	650	61	30	2
11	1	70	170	57	19.7	28	30	536.3	4.3	3.79	675	33	16	1
12	1	72	162	65	24.8	27	23	366	1.89	1.89	541.9	57	33	2
13	1	74	168	64	22.7	27	25	400.4	2.9	1.65	200	50	27	1
14	1	71	169	64	22.4	29	23	363.4	5.9	5.07	620	61	34	2
15	2	66	154	48	20.2	29	29	550	6.07	6.07	100	29	23	1
16	1	75	171	79	27	28	25	449.9	2.9	2.9	400	53	30	2
17	2	64	149	50	22.5	29	25	505.5	1.57	0.57	541.9	42	25	2
18	1	61	166	66	24	26	18	422.8	6.91	5.24	600	62	43	2
19	1	61	169	65	22.8	30	25	480	4.91	3.58	200	44	27	1
20	1	70	175	75	24.5	26	24	347.7	3.91	3.91	541.9	94	64	2
21	2	76	156	59	24.2	27	20	360	7.02	7.02	610	69	43	2
22	1	68	166	61	22.1	28	23	404.5	17.95	17.95	900	89	57	2
23	1	64	162	61	23.2	25	23	604.4	3.03	3.03	600	34	11	1
24	1	65	164	76	28.3	28	28	416	10.96	5.29	437.5	29	17	2
25	1	68	174	80	26.4	30	27	480	5.95	3.95	375	51	39	2
26	2	76	152	48	20.8	29	27	426.2	3.95	2.7	200	33	15	1
27	2	70	154	53	22.3	27	26	332	7.97	7.97	410	80	62	2
28	2	62	161	55	21.2	30	27	331.7	2.98	1.06	300	45	31	2
29	2	74	148	56	25.6	30	28	365.7	3.98	3.98	675	58	31	2
30	2	55	160	58	22.7	30	29	508.3	3.98	3.73	250	20	10	1
31	1	55	170	67	23.2	28	27	461.5	10.99	10.99	1430	59	27	2
32	2	66	160	61	23.8	27	24	355.4	5.66	5.66	575	24	11	1
33	1	65	173	74	24.7	28	26	540	1.98	0.57	130	32	12	1
34	1	67	166	67	24.3	27	25	390.9	1.83	1.66	500	73	49	2
35	1	70	165	68	25	29	24	444.3	5.99	3.99	820	51	28	2
36	1	65	159	59	23.3	28	28	395.9	10.01	8.52	775	60	24	2
37	2	73	160	55	21.5	30	29	378.8	3.01	0.68	400	39	20	2
38	2	67	153.7	61	25.8	28	29	400.8	5.10959	2.77808	975	12	6	1
39	2	60	158	71.8	28.8	28	27	443	5.10959	3.10959	280	23	12	1
40	2	64	163.2	61.8	23.2	27	28	449	1.86027	1.86027	541.9	42	18	1
41	1	70	164.8	70.2	25.8	28	25	508.4	5.11233	5.11233	700	51	46	2
42	2	65	155	69.1	28.8	28	25	385.4	6.11233	6.11233	380	46	28	2
43	1	75	162.6	70.1	26.5	21	17	437	7.12329	6.12055	390	53	33	2
44	1	75	165.4	61	22.3	29	29	411	4.12055	4.12055	220	29	13	1
45	1	68	168.1	72.5	25.7	29	29	539.7	0.632877	0.632877	541.9	26	7	1
46	2	56	162	50.4	19.2	30	29	445	8.13425	6.55068	775	50	20	2
47	2	64	158.5	57.6	22.9	30	28	292.9	6.13151	3.21644	575	47	23	2
48	2	66	152.1	73.1	31.6	28	27	360	8.14247	6.13973	990	50	19	2
49	1	44	177.9	99.8	31.5	30	28	420.5	13.1507	2.47671	580	79	43	2
50	2	58	165	85	31.2	26	29	446.5	2.14247	1.14247	325	50	23	2
51	1	68	166	76.1	27.6	30	28	475.6	1.23014	1.23014	300	35	12	2
52	2	61	155.6	55	22.7	28	25	457.8	3.15068	2.48219	541.9	37	23	1
53	2	68	158.6	69	27.4	30	27	347.7	3.15068	0.482192	300	48	32	2
54	1	62	163.6	75.4	28.2	30	27	438.4	6.1589	6.1589	950	33	16	1
55	2	71	151.5	61.5	26.8	30	29	383.3	10.211	10.211	825	69	39	2
56	2	68	160	55.7	21.8	30	28	589	3.20822	0.876712	270	23	11	1
57	2	68	155.1	59.3	24.7	30	28	462	0.876712	0.876712	488	40	14	1
58	2	63	160.9	71.9	27.8	26	27	390	3.21644	3.21644	437.5	18	12	2
59	2	67	163.3	60.3	22.6	29	29	560.7	1.06301	1.06301	200	56	24	2
60	2	65	151.5	57.5	25.1	26	28	409.5	2.39178	1.39178	275	33	16	2
61	2	63	152	48.6	21	30	30	440.4	4.2274	3.2274	150	12	7	1
62	2	75	150	54.5	24.2	22	20	463.2	6.2411	6.2411	495	42	21	2
63	1	72	161.7	74.7	28.6	29	26	360	3.26575	3.26575	1130	55	15	2
64	2	64	146.6	40	18.6	27	28	508	5.27945	0.69589	400	23	11	1
65	1	66	158	58.3	23.4	29	25	454.5	24.2932	3.27945	400	29	11	1
66	2	64	157.7	69.2	27.8	28	23	432	1.27945	0.446575	541.9	57	15	2
67	1	71	166.5	64.9	23.4	28	29	454	5.28493	3.26575	538	74	29	2
68	1	77	159.7	60.3	23.6	26	26	382	7.28767	5.28493	585	63	32	1
69	2	74	155.9	55.4	22.8	24	18	403.8	0.882192	0.882192	541.9	16	7	1
70	2	70	151	62.9	27.6	27	25	321	3.72329	3.72329	629	43	13	1
71	1	73	165.2	64.4	23.6	29	26	426	3.31781	3.31781	726.25	41	27	2
72	1	74	170	72.9	25.2	29	23	174	4.31781	4.31781	420	89	52	2
73	2	79	149.7	48.5	21.6	29	28	468	7.07123	6.40274	450	40	18	2
74	2	79	156.2	53.2	21.8	29	29	430	1.1589	0.654795	200	24	2	1
75	1	80	172.5	62.4	21	27	26	420	7.32603	3.32329	541.9	57	19	2
76	2	74	142.9	66.3	32.5	23	21	260	1.32055	1.32055	300	90	55	2
77	1	79	167.3	56.3	20.1	29	25	320	11.3288	9.41096	1135	89	43	2
78	2	65	151.8	46.6	20.2	29	30	439.1	14.1151	14.1151	600	45	25	2
Controls	Sex (male/female)	Age (years)	Height (cm)	Body mass (kg)	BMI (kg/m2)	MMSE (scores)	MoCA (scores)	6MWT (m)
1	2	62	152.5	44.8	19.3	29	30	569.5
2	2	63	153.2	49	20.9	30	23	480.8
3	2	64	154.2	54.3	22.8	27	22	490
4	1	62	170.5	75.2	25.9	29	25	442
5	2	61	158	57.7	23.1	30	30	461.7
6	1	61	176	73	23.6	30	24	465
7	1	73	167	73	26.2	27	26	556
8	2	70	157	59	23.9	25	26	444
9	2	64	156.2	59.7	24.5	30	30	509
10	1	63	169.8	69.6	24.1	28	26	488.6
11	2	63	159.7	60.1	23.6	28	29	426
12	2	61	156.3	59.6	24.4	28	30	482.2
13	2	71	146	43.2	20.3	26	19	482.5
14	2	73	146.6	52.4	24.4	25	24	403
15	2	68	152.5	61.9	26.6	28	26	443.4
16	2	70	161	65.3	25.2	27	24	484.5
17	1	77	171.7	67.3	22.8	28	24	509
18	1	70	168.8	77.9	27.3	23	23	490
19	1	69	171.6	76.2	25.9	30	30	454.2
20	1	77	167	70	25.1	27	24	469
21	2	75	149	56	25.2	26	24	437
22	2	74	159.2	61.9	24.4	27	26	396.6
23	2	58	153	54.5	23.3	30	26	440
24	1	63	175	72.3	23.6	29	25	530.7
25	2	65	154.6	65	27.2	26	22	469.7
26	2	73	150	42.8	19	23	24	457.4
27	2	69	152.2	59.4	25.6	26	23	517
28	2	69	149.8	50	22.3	28	22	475.6
29	1	77	167.3	64.3	23	24	22	606.9
30	2	69	162	68.9	26.3	24	22	419
31	2	71	155.3	52.6	21.8	28	18	552.4
32	1	64	164.3	66.1	24.5	28	27	532.7
33	2	62	154	60.2	25.4	28	26	611.9
34	2	60	159.2	53.1	21	26	29	497.1
35	2	61	156.7	72.1	29.4	27	22	466.6
36	1	65	169.1	70.4	24.6	28	26	570
37	2	64	164.8	65.5	24.1	26	22	565.3
38	2	61	159.4	60.2	23.7	25	23	540
39	2	64	154.5	61.7	25.8	26	21	580
40	1	62	173.9	90.7	30	27	27	470.3
41	2	62	157.5	64.6	26	28	27	543.6
42	1	67	173.9	68	22.5	23	20	469.6
43	2	53	150.3	57.9	25.6	29	25	446.7
44	1	60	170.5	62.3	21.4	29	26	493
45	1	66	167	76.1	27.3	28	27	516.4
46	1	68	163	61.6	23.2	26	20	484.3
47	1	60	166.5	86.5	31.2	26	27	539
48	1	64	171.5	69.7	23.7	29	25	532.5
49	1	57	165.4	69.5	25.4	28	25	555
50	1	65	172.5	70.9	23.8	28	29	444.6
