# Supplementary material for: Early Detection of Parkinson’s Disease Using a Single-Arm Wearable Sensor and Convolutional Neural Networks
Source: Research Square preprint supplement (doi:10.21203/rs.3.rs-7285962/v1), 2025-08-12
Supplement: Supplementary file 2 [file 795872ff30a6e893df8da5fb.docx]

| **Supplementary Table 1.** Cumulative number of straight and turning gait phase samples by minute in people with early-stage PD and controls | | | | | | |
| --- | --- | --- | --- | --- | --- | --- |
| Analysis group | 1 min | 2 min | 3 min | 4 min | 5 min | 6 min |
| Controls | 150 | 300 | 450 | 600 | 750 | 900 |
| Early PDs | 234 | 468 | 702 | 936 | 1170 | 1404 |
| The values indicate the number of samples for each gait type (straight and turning) separately. Therefore, the number of straight and turning gait samples is equal at each minute. PD: Parkinson’s disease; Early PDs: People with early-stage PD. | | | | | | |
