# Supplementary material for: Early Detection of Parkinson’s Disease Using a Single-Arm Wearable Sensor and Convolutional Neural Networks
Source: Research Square preprint supplement (doi:10.21203/rs.3.rs-7285962/v1), 2025-08-12
Supplement: Supplementary file 3 [file cf888c5b00d314d7b9101f16.docx]

| **Supplementary Table 2.** Complete pairwise comparison results for the top 10 sensor–variable combinations during the straight gait phase | | | | |
| --- | --- | --- | --- | --- |
| Segment | Variable | Comparison (Minutes) | *p*-value | Adjusted *p*-value |
| Left arm | Gyr_X | 1 min vs. 2 min | 0.016 | 0.246 |
| 1 min vs. 3 min | 0.120 | 1.000 |
| 1 min vs. 4 min | 0.042 | 0.637 |
| 1 min vs. 5 min | 0.149 | 1.000 |
| 1 min vs. 6 min | 0.088 | 1.000 |
| 2 min vs. 3 min | 0.458 | 1.000 |
| 2 min vs. 4 min | 0.140 | 1.000 |
| 2 min vs. 5 min | 0.073 | 1.000 |
| 2 min vs. 6 min | 0.013 | 0.193 |
| 3 min vs. 4 min | 0.438 | 1.000 |
| 3 min vs. 5 min | 0.367 | 1.000 |
| 3 min vs. 6 min | 0.659 | 1.000 |
| 4 min vs. 5 min | 0.654 | 1.000 |
| 4 min vs. 6 min | 0.913 | 1.000 |
| 5 min vs. 6 min | 0.770 | 1.000 |
| Left arm | Gyr_Y | 1 min vs. 2 min | 0.162 | 1.000 |
| 1 min vs. 3 min | 0.084 | 1.000 |
| 1 min vs. 4 min | 0.207 | 1.000 |
| 1 min vs. 5 min | 0.930 | 1.000 |
| 1 min vs. 6 min | 0.732 | 1.000 |
| 2 min vs. 3 min | 0.446 | 1.000 |
| 2 min vs. 4 min | 0.608 | 1.000 |
| 2 min vs. 5 min | 0.408 | 1.000 |
| 2 min vs. 6 min | 0.320 | 1.000 |
| 3 min vs. 4 min | 0.711 | 1.000 |
| 3 min vs. 5 min | 0.405 | 1.000 |
| 3 min vs. 6 min | 0.298 | 1.000 |
| 4 min vs. 5 min | 0.139 | 1.000 |
| 4 min vs. 6 min | 0.097 | 1.000 |
| 5 min vs. 6 min | 0.125 | 1.000 |
| Left arm | Acc_XYZ | 1 min vs. 2 min | 0.007 | 0.111 |
| 1 min vs. 3 min | 0.017 | 0.258 |
| 1 min vs. 4 min | 0.001 | 0.010 |
| 1 min vs. 5 min | 0.001 | 0.017 |
| 1 min vs. 6 min | 0.039 | 0.579 |
| 2 min vs. 3 min | 0.951 | 1.000 |
| 2 min vs. 4 min | 0.061 | 0.909 |
| 2 min vs. 5 min | 0.033 | 0.492 |
| 2 min vs. 6 min | 0.041 | 0.609 |
| 3 min vs. 4 min | 0.099 | 1.000 |
| 3 min vs. 5 min | 0.052 | 0.780 |
| 3 min vs. 6 min | 0.005 | 0.077 |
| 4 min vs. 5 min | 0.001 | 0.019 |
| 4 min vs. 6 min | 0.158 | 1.000 |
| 5 min vs. 6 min | 0.874 | 1.000 |
| Left arm | Gyr_Z | 1 min vs. 2 min | 0.011 | 0.160 |
| 1 min vs. 3 min | 0.006 | 0.083 |
| 1 min vs. 4 min | 0.058 | 0.873 |
| 1 min vs. 5 min | 0.262 | 1.000 |
| 1 min vs. 6 min | 0.503 | 1.000 |
| 2 min vs. 3 min | 0.036 | 0.534 |
| 2 min vs. 4 min | 0.019 | 0.279 |
| 2 min vs. 5 min | 0.042 | 0.626 |
| 2 min vs. 6 min | 0.010 | 0.149 |
| 3 min vs. 4 min | 0.042 | 0.632 |
| 3 min vs. 5 min | 0.056 | 0.839 |
| 3 min vs. 6 min | 0.022 | 0.330 |
| 4 min vs. 5 min | 0.168 | 1.000 |
| 4 min vs. 6 min | 0.012 | 0.173 |
| 5 min vs. 6 min | 0.599 | 1.000 |
| Left arm | Acc_X | 1 min vs. 2 min | 0.005 | 0.075 |
| 1 min vs. 3 min | 0.008 | 0.118 |
| 1 min vs. 4 min | 0.009 | 0.138 |
| 1 min vs. 5 min | 0.276 | 1.000 |
| 1 min vs. 6 min | 0.176 | 1.000 |
| 2 min vs. 3 min | 0.137 | 1.000 |
| 2 min vs. 4 min | 0.037 | 0.556 |
| 2 min vs. 5 min | 0.115 | 1.000 |
| 2 min vs. 6 min | 0.006 | 0.084 |
| 3 min vs. 4 min | 0.708 | 1.000 |
| 3 min vs. 5 min | 0.206 | 1.000 |
| 3 min vs. 6 min | 0.025 | 0.379 |
| 4 min vs. 5 min | 0.135 | 1.000 |
| 4 min vs. 6 min | 0.003 | 0.048 |
| 5 min vs. 6 min | 0.404 | 1.000 |
| Left arm | Gyr_XYZ | 1 min vs. 2 min | 0.036 | 0.544 |
| 1 min vs. 3 min | 0.017 | 0.255 |
| 1 min vs. 4 min | 0.024 | 0.355 |
| 1 min vs. 5 min | 0.060 | 0.905 |
| 1 min vs. 6 min | 0.053 | 0.801 |
| 2 min vs. 3 min | 0.537 | 1.000 |
| 2 min vs. 4 min | 0.128 | 1.000 |
| 2 min vs. 5 min | 0.034 | 0.510 |
| 2 min vs. 6 min | 0.046 | 0.689 |
| 3 min vs. 4 min | 0.187 | 1.000 |
| 3 min vs. 5 min | 0.072 | 1.000 |
| 3 min vs. 6 min | 0.084 | 1.000 |
| 4 min vs. 5 min | 0.083 | 1.000 |
| 4 min vs. 6 min | 0.040 | 0.605 |
| 5 min vs. 6 min | 0.302 | 1.000 |
| Left arm | Acc_Y | 1 min vs. 2 min | 0.002 | 0.034 |
| 1 min vs. 3 min | 0.004 | 0.064 |
| 1 min vs. 4 min | 0.005 | 0.069 |
| 1 min vs. 5 min | 0.005 | 0.074 |
| 1 min vs. 6 min | 0.010 | 0.152 |
| 2 min vs. 3 min | 0.311 | 1.000 |
| 2 min vs. 4 min | 0.127 | 1.000 |
| 2 min vs. 5 min | 0.110 | 1.000 |
| 2 min vs. 6 min | 0.266 | 1.000 |
| 3 min vs. 4 min | 0.017 | 0.248 |
| 3 min vs. 5 min | 0.082 | 1.000 |
| 3 min vs. 6 min | 0.041 | 0.614 |
| 4 min vs. 5 min | 0.767 | 1.000 |
| 4 min vs. 6 min | 0.311 | 1.000 |
| 5 min vs. 6 min | 0.532 | 1.000 |
| Left arm | Acc_Z | 1 min vs. 2 min | 0.960 | 1.000 |
| 1 min vs. 3 min | 0.889 | 1.000 |
| 1 min vs. 4 min | 0.826 | 1.000 |
| 1 min vs. 5 min | 0.751 | 1.000 |
| 1 min vs. 6 min | 0.705 | 1.000 |
| 2 min vs. 3 min | 0.775 | 1.000 |
| 2 min vs. 4 min | 0.115 | 1.000 |
| 2 min vs. 5 min | 0.278 | 1.000 |
| 2 min vs. 6 min | 0.152 | 1.000 |
| 3 min vs. 4 min | 0.096 | 1.000 |
| 3 min vs. 5 min | 0.046 | 0.696 |
| 3 min vs. 6 min | 0.034 | 0.514 |
| 4 min vs. 5 min | 0.642 | 1.000 |
| 4 min vs. 6 min | 0.311 | 1.000 |
| 5 min vs. 6 min | 0.300 | 1.000 |
| Left thigh | Acc_XYZ | 1 min vs. 2 min | 0.065 | 0.975 |
| 1 min vs. 3 min | 0.018 | 0.269 |
| 1 min vs. 4 min | 0.001 | 0.009 |
| 1 min vs. 5 min | 0.019 | 0.289 |
| 1 min vs. 6 min | 0.003 | 0.048 |
| 2 min vs. 3 min | 0.103 | 1.000 |
| 2 min vs. 4 min | 0.151 | 1.000 |
| 2 min vs. 5 min | 0.004 | 0.067 |
| 2 min vs. 6 min | 0.033 | 0.490 |
| 3 min vs. 4 min | 0.239 | 1.000 |
| 3 min vs. 5 min | 0.087 | 1.000 |
| 3 min vs. 6 min | 0.038 | 0.577 |
| 4 min vs. 5 min | 0.751 | 1.000 |
| 4 min vs. 6 min | 0.192 | 1.000 |
| 5 min vs. 6 min | 0.361 | 1.000 |
| Lumbar spine | Acc_Y | 1 min vs. 2 min | 0.314 | 1.000 |
| 1 min vs. 3 min | 0.337 | 1.000 |
| 1 min vs. 4 min | 0.283 | 1.000 |
| 1 min vs. 5 min | 0.221 | 1.000 |
| 1 min vs. 6 min | 0.165 | 1.000 |
| 2 min vs. 3 min | 0.603 | 1.000 |
| 2 min vs. 4 min | 0.385 | 1.000 |
| 2 min vs. 5 min | 0.007 | 0.101 |
| 2 min vs. 6 min | 0.009 | 0.136 |
| 3 min vs. 4 min | 0.420 | 1.000 |
| 3 min vs. 5 min | 0.045 | 0.676 |
| 3 min vs. 6 min | 0.084 | 1.000 |
| 4 min vs. 5 min | 0.638 | 1.000 |
| 4 min vs. 6 min | 0.424 | 1.000 |
| 5 min vs. 6 min | 0.185 | 1.000 |
| Pairwise comparisons of classification accuracy across all time intervals (1–6 min) were conducted for the top 10 sensor–variable combinations identified during the straight walking phase. Mean classification accuracy across models was used for the analysis. Bonferroni correction was applied to adjust for multiple comparisons. Gyr: gyroscope; Acc: accelerometer; XYZ: resultant values of accelerometer and gyroscope data. | | | | |
